# Supplementary material
Source: MDPI journal article supplement (https://www.mdpi.com/2073-4344/11/10/1165)
Supplement: s1 [file s1]

*Supplementary Information*

*for*

**Multifunctional electrocatalysis on single-site metal catalysts: a computational perspective**

Ritums Cepitis <sup>1</sup>, Nadezda Kongi <sup>1\*</sup>, Vitali Grozovski <sup>1</sup>, Vladislav Ivaništšev <sup>1\*</sup> and Enn Lust

<sup>1</sup> Institute of Chemistry, University of Tartu, 50411 Tartu, Estonia

\* Correspondence: [nadezda.kongi@ut.ee](mailto:nadezda.kongi@ut.ee) (NK); [vladislav.ivanistsev@ut.ee](mailto:vladislav.ivanistsev@ut.ee) (VI)

**Table S1.** Calculated DFT energies and overpotentials for CoN<sub>4</sub>, FeN<sub>4</sub> and NiN<sub>4</sub> with single-site adsorption mechanism, and NiN<sub>4</sub> with double-site adsorption mechanism. All energies are in eV.

| Surface species with PCM |          |          |         |              |           |         |
|--------------------------|----------|----------|---------|--------------|-----------|---------|
| Species                  | Non-solv | ZPE corr | Cv corr | Entropy corr | TS09 corr | Energy  |
| Co                       | -538.71  | -        | -       | -            | -2.71     | -541.41 |
| Co_ooh                   | -554.35  | 0.45     | 0.09    | -0.17        | -2.88     | -556.86 |
| Co_o                     | -544.24  | 0.08     | 0.02    | -0.03        | -2.77     | -546.94 |
| Co_oh                    | -549.53  | 0.35     | 0.05    | -0.09        | -2.82     | -552.04 |
| Fe                       | -539.33  | -        | -       | -            | -2.71     | -542.03 |
| Fe_ooh                   | -555.28  | 0.45     | 0.08    | -0.14        | -2.88     | -557.77 |
| Fe_o                     | -546.04  | 0.06     | 0.04    | -0.08        | -2.78     | -548.80 |
| Fe_oh                    | -550.41  | 0.34     | 0.06    | -0.11        | -2.82     | -552.94 |
| Ni                       | -538.00  | -        | -       | -            | -2.70     | -540.70 |
| Ni_ooh                   | -552.65  | 0.46     | 0.08    | -0.13        | -2.86     | -555.11 |
| Ni_o                     | -542.05  | 0.04     | 0.05    | -0.12        | -2.76     | -544.85 |
| Ni_oh                    | -547.77  | 0.32     | 0.07    | -0.12        | -2.81     | -550.31 |
| Ni_o_d                   | -543.00  | 0.09     | 0.02    | -0.04        | -2.75     | -545.68 |
| Ni_oh_d                  | -547.54  | 0.40     | 0.03    | -0.05        | -2.81     | -549.97 |
| Small molecule data      |          |          |         |              |           |         |
| H <sub>2</sub>           | -6.75    | 0.27     | 0.09    | -0.40        | 0.00      | -6.80   |
| H <sub>2</sub> O         | -14.57   | 0.57     | 0.10    | -0.58        | 0.00      | -14.48  |
| O <sub>2</sub>           | -        | -        | -       | -            | -         | -10.44  |

| Calculated energy levels                               |       |       |       |         |
|--------------------------------------------------------|-------|-------|-------|---------|
|                                                        | Co    | Fe    | Ni    | Ni_dual |
| *+O <sub>2</sub> +4(H <sup>+</sup> +e <sup>-</sup> )   | 0.00  | 0.00  | 0.00  | 0.00    |
| OOH*+3(H <sup>+</sup> +e <sup>-</sup> )                | -1.61 | -1.89 | -0.57 | -0.57   |
| O*+2(H <sup>+</sup> +e <sup>-</sup> )+H <sub>2</sub> O | -2.76 | -4.00 | -1.40 | -2.22   |
| OH*+(H <sup>+</sup> +e <sup>-</sup> )+H <sub>2</sub> O | -4.47 | -4.75 | -3.46 | -3.12   |
| *+2H <sub>2</sub> O                                    | -4.92 | -4.92 | -4.92 | -4.92   |

| Calculated overpotentials |      |      |      |         |
|---------------------------|------|------|------|---------|
|                           | Co   | Fe   | Ni   | Ni_dual |
| ORR                       | 0.78 | 1.06 | 0.66 | 0.66    |
| OER                       | 0.47 | 0.88 | 0.83 | 0.57    |
